# Supplementary material for: Prognostic Value of Fusobacterium nucleatum after Abdominoperineal Resection for Anal Squamous Cell Carcinoma
Source: MDPI journal article supplement (doi:10.3390/cancers14071606), 2022-03-22
Supplement: s1 [file s1]

### Distribution of *F.nucleatum* loads

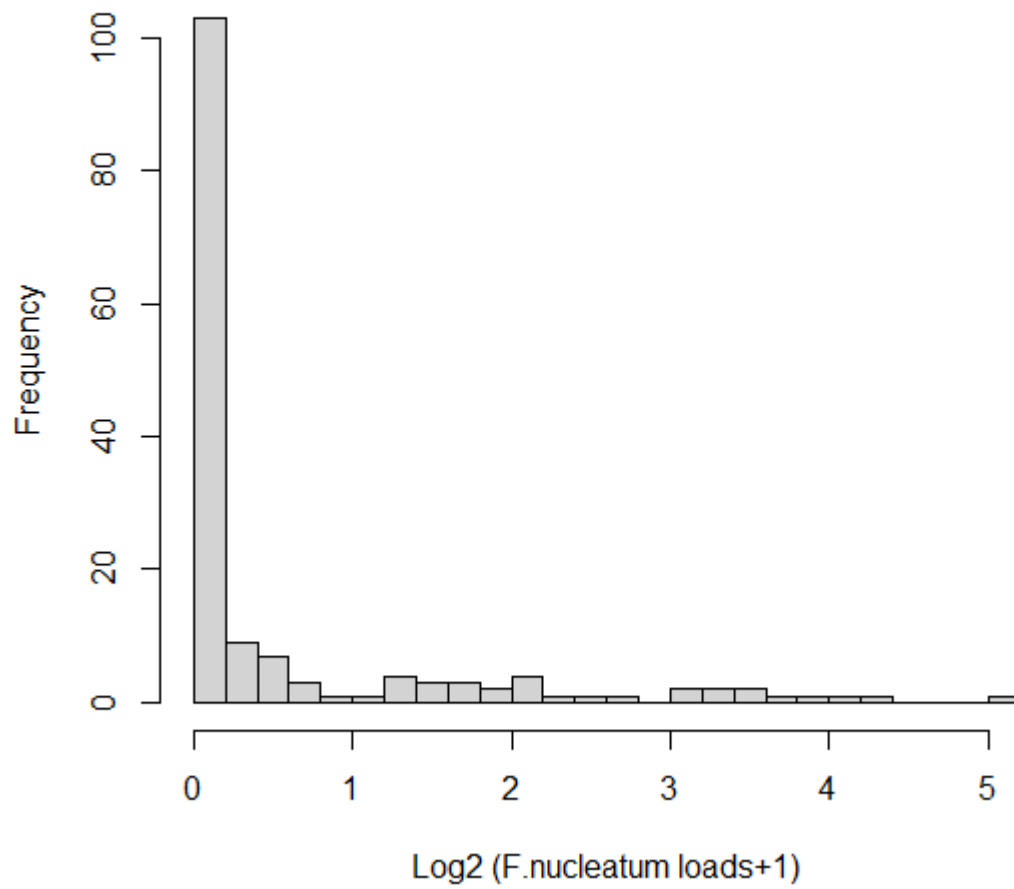

**Figure S1.** Distribution of normalized and logged *Fusobacterium* loads in the patient population.

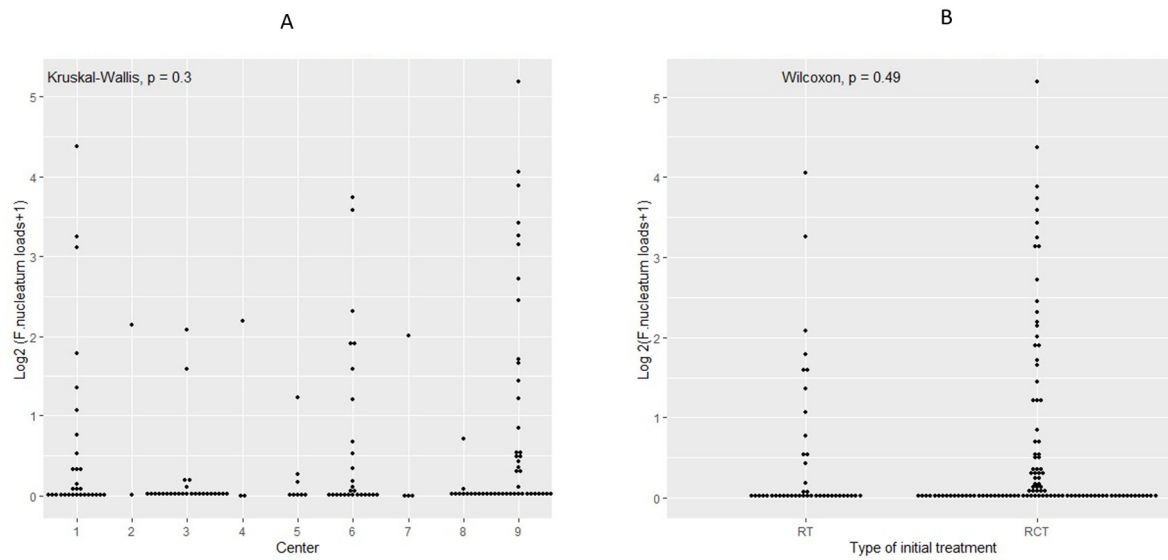

**Figure S2.** Distribution of normalized Fusobacterium loads. Distribution of logged Fusobacterium loads according to individual centers (A) and the type of initial treatment (B).

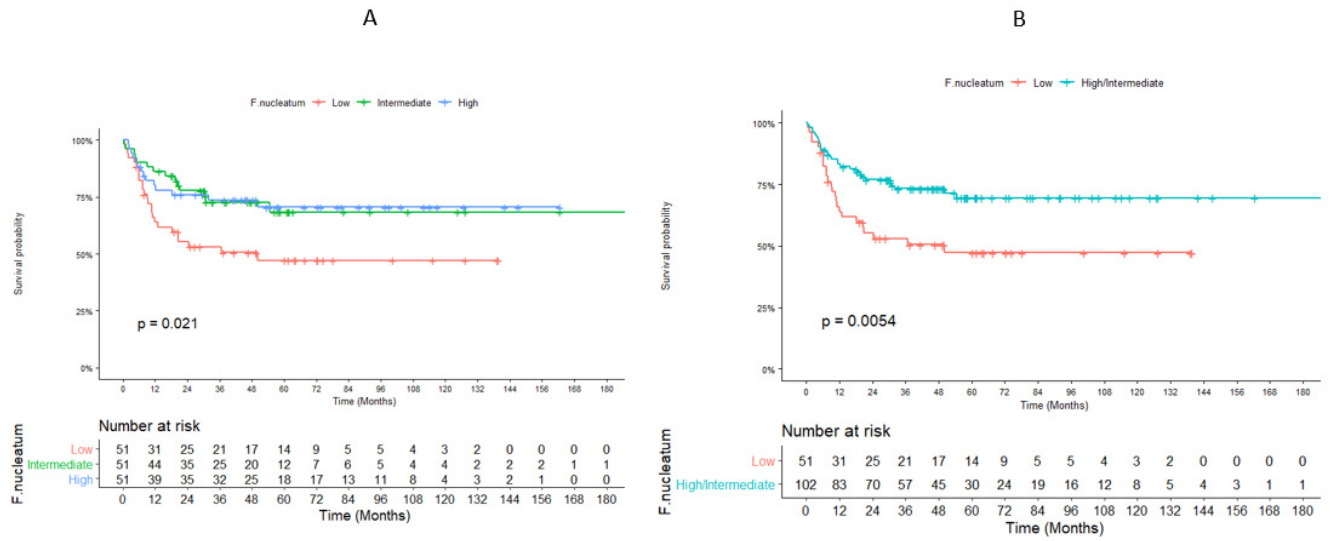

**Figure S3.** Association between metastasis-free survival and *Fusobacterium nucleatum*. Metastasis-free survival curves for the *Fusobacterium nucleatum* divided in 3 categories according to terciles (**A**) and 2 categories according to terciles (**B**),  $n = 153$  patients.

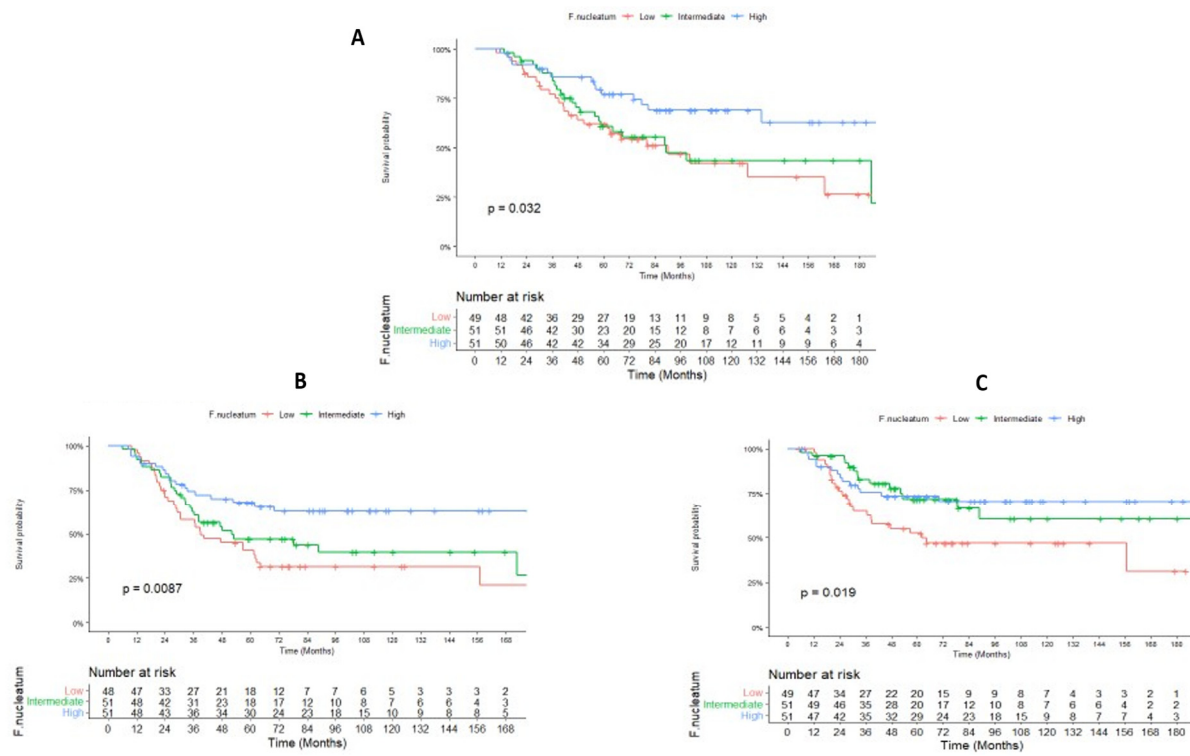

**Figure S4.** Association between survival with the diagnosis taken as starting point and *Fusobacterium nucleatum*. Overall-free survival (A), disease-free survival (B) and metastasis-free survival (C) curves for the *Fusobacterium nucleatum* divided in 3 categories according to terciles.

A

| Variable                                         | N   | Hazard ratio      | p    |
|--------------------------------------------------|-----|-------------------|------|
| Age < 65 years                                   | 140 | 2.02 (1.04, 3.92) | 0.04 |
| Perineural invasion                              | 140 | 1.98 (1.12, 3.52) | 0.02 |
| TNM stage                                        |     |                   |      |
| I                                                | 13  | Reference         |      |
| II                                               | 66  | 1.02 (0.33, 3.16) | 0.97 |
| III/IV                                           | 61  | 0.76 (0.23, 2.47) | 0.65 |
| Initial treatment                                |     |                   |      |
| RT                                               | 38  | Reference         |      |
| RCT                                              | 102 | 1.06 (0.51, 2.24) | 0.87 |
| Gender (female vs male)                          | 140 | 1.47 (0.78, 2.76) | 0.23 |
| <b>Fusobacterium nucleatum (highest tercile)</b> | 140 | 0.70 (0.36, 1.36) | 0.29 |

B

| Variable                                        | N   | Hazard ratio      | p     |
|-------------------------------------------------|-----|-------------------|-------|
| Age < 65 years                                  | 140 | 2.05 (1.05, 4.01) | 0.035 |
| Perineural invasion                             | 140 | 2.13 (1.20, 3.77) | 0.010 |
| TNM stage                                       |     |                   |       |
| I                                               | 13  | Reference         |       |
| II                                              | 66  | 1.20 (0.38, 3.73) | 0.758 |
| III/IV                                          | 61  | 0.87 (0.27, 2.86) | 0.824 |
| Initial treatment                               |     |                   |       |
| RT                                              | 38  | Reference         |       |
| RCT                                             | 102 | 1.01 (0.48, 2.15) | 0.973 |
| Gender (female vs male)                         | 140 | 1.42 (0.75, 2.68) | 0.279 |
| <b>Fusobacterium nucleatum (lowest tercile)</b> | 140 | 2.25 (1.26, 4.01) | 0.006 |

**Figure S5.** Prognostic value of clinicopathological factors and *Fusobacterium nucleatum*. Multivariate analysis for the clinicopathological factors regarding metastasis-free-survival ( $n = 150$  patients), with the highest tercile (A) or lowest tercile (B) as a reference for *Fusobacterium* loads.
